# Supplementary material
Source: HighWire-hosted journal article supplement (https://erj.ersjournals.com/content/61/3/2200558)
Supplement: inline-supplementary-material-1 [file inline-supplementary-material-1.pdf]

Online supplement

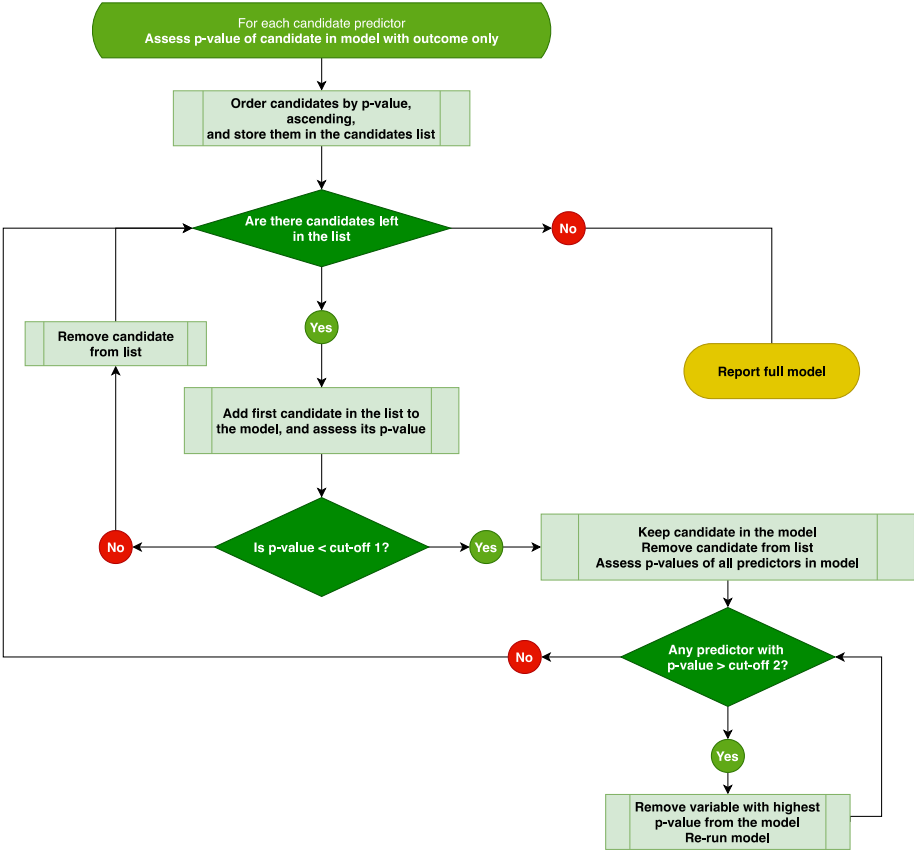

Figure A1 Approach of predictor selection

**Cut-off 1:** upper limit for inclusion of a candidate predictor. **Cut-off 2:** lower limit of removal of a variable earlier included in the model. Using  $p=0.075$  as the upper limit for candidate predictor inclusion (cut-off 1) and  $p=0.10$  as the lower limit of variable removal (cut-off 2). Sensitivity analyses were performed using lower cut-offs of  $p=0.05$  for inclusion and  $p=0.075$  for removal to assess if the results were sensitive to the cut-off choice.
