# Supplementary material
Source: HighWire-hosted journal article supplement (https://erj.ersjournals.com/content/61/3/2200558)
Supplement: inline-supplementary-material-2 [file inline-supplementary-material-2.pdf]

## Online supplement

**Table A1.** Regression coefficients of adjusted model with physiological SAD score and individual SADT-items

| Q  | Coeff  | P     |
|----|--------|-------|----|--------|-------|----|--------|-------|----|--------|-------|
| 1  | 0.032  | 0.283 | 17 | 0.138  | 0.000 | 33 | -0.011 | 0.727 | 50 | 0.062  | 0.094 |
| 2  | 0.078  | 0.178 | 18 | 0.122  | 0.001 | 34 | -0.041 | 0.208 | 51 | -0.088 | 0.029 |
| 3  | -0.024 | 0.408 | 19 | 0.050  | 0.090 | 35 | -0.043 | 0.128 | 52 | -0.013 | 0.784 |
| 4  | -0.078 | 0.006 | 20 | 0.097  | 0.000 | 36 | -0.044 | 0.124 | 53 | -0.092 | 0.002 |
| 5  | -0.064 | 0.046 | 21 | 0.082  | 0.003 | 37 | 0.059  | 0.063 | 54 | -0.071 | 0.015 |
| 6  | 0.077  | 0.008 | 22 | 0.076  | 0.007 | 38 | -0.060 | 0.039 | 55 | -0.073 | 0.009 |
| 7  | -0.136 | 0.000 | 23 | 0.108  | 0.000 | 39 | 0.008  | 0.817 | 56 | -0.091 | 0.001 |
| 8  | 0.155  | 0.000 | 24 | 0.024  | 0.391 | 40 | -0.066 | 0.024 | 57 | -0.029 | 0.289 |
| 9  | 0.002  | 0.948 | 25 | 0.009  | 0.748 | 42 | -0.096 | 0.001 | 58 | 0.090  | 0.001 |
| 10 | 0.004  | 0.873 | 26 | 0.069  | 0.020 | 43 | 0.055  | 0.094 | 59 | 0.091  | 0.001 |
| 11 | 0.023  | 0.403 | 27 | 0.059  | 0.075 | 44 | -0.047 | 0.103 | 60 | 0.067  | 0.015 |
| 12 | 0.024  | 0.390 | 28 | 0.033  | 0.234 | 45 | 0.058  | 0.037 | 61 | 0.043  | 0.124 |
| 13 | -0.010 | 0.790 | 29 | 0.012  | 0.681 | 46 | 0.161  | 0.000 | 62 | 0.021  | 0.640 |
| 14 | -0.038 | 0.201 | 30 | 0.038  | 0.175 | 47 | 0.069  | 0.023 | 63 | -0.005 | 0.871 |
| 15 | 0.076  | 0.006 | 31 | 0.013  | 0.679 | 48 | -0.064 | 0.036 | 50 | 0.062  | 0.094 |
| 16 | 0.115  | 0.000 | 32 | -0.028 | 0.382 | 49 | -0.029 | 0.406 |    |        |       |

Adjusted for age, age at asthma diagnosis, sex, and height; Q: SADT-item number; Coeff: Linear regression coefficient; P: P-value of regression coefficient; Red font: negative association and p-value <0.05.

**Table A2.** Area under the receiver operating curve (AUC) and positive likelihood ratio (LR+) of prediction models with different number of SADT-items, based selection frequency, with SAD group as outcome.

| Min. freq | Number of selected questions | AUC   |        | LR+   |      | Selected questions                                                      |
|-----------|------------------------------|-------|--------|-------|------|-------------------------------------------------------------------------|
|           |                              | Value | Gain   | Value | Gain |                                                                         |
| 60        | 0                            | 0.685 |        | 2.4   |      |                                                                         |
|           | 1                            | 0.703 | 0.017  | 2.3   | 0.0  | 8                                                                       |
| 50        | 3                            | 0.708 | 0.023  | 2.6   | 0.3  | 8, 16, 46                                                               |
| 40        | 7                            | 0.712 | 0.026  | 2.3   | -0.1 | 8, 16, 46, 21, 43, 52, 34                                               |
| 30        | 11                           | 0.713 | 0.028  | 2.3   | -0.1 | 8, 16, 46, 21, 43, 52, 34, 9, 3, 22, 28                                 |
| 20        | 14                           | 0.715 | 0.030  | 2.1   | -0.2 | 8, 16, 46, 21, 43, 52, 34, 9, 3, 22, 28, 27, 17, 26                     |
| 10        | 31                           | 0.698 | 0.013  | 2.0   | -0.4 | 8, 16, 46, 21, 43, 52, 34, 9, 3, 22, 28, 27, 17, 26, 29, 24, 39, 62, 1, |
| 5         | 45                           | 0.684 | -0.002 | 1.5   | -0.8 | 35, 10, 23, 11, 14, 18, 49, 60, 31, 33, 15, 36,                         |
|           |                              |       |        |       |      | All except 20, 58, 6, 57, 47                                            |

Gain = Difference with model without questions

**Table A3.** Overview of achievable area under the receiver operating curve (AUC) and positive likelihood ratio (LR+) for the three prediction models (Bronze, Silver, Gold, and the independent parameters within each model) for 3 combinations of selected SADT-items (Item 8, Item 8 and 17, Item 8 and 16).

|        | #  | Ag | Ad | B | Q | F | R | X | Item 8 |      | Interactions |      | Item 8 and 17 |      | Interactions |      | Item 8 and 16 |      | Interactions |      |
|--------|----|----|----|---|---|---|---|---|--------|------|--------------|------|---------------|------|--------------|------|---------------|------|--------------|------|
|        |    |    |    |   |   |   |   |   | AUC    | LR+  | AUC          | LR+  | AUC           | LR+  | AUC          | LR+  | AUC           | LR+  | AUC          | LR+  |
| Bronze | 1  |    |    |   |   |   |   |   | 0.616  | 1.8  | 0.616        | 1.8  | 0.616         | 1.8  | 0.616        | 1.8  | 0.616         | 1.8  | 0.616        | 1.8  |
|        | 2  |    |    |   |   |   |   |   | 0.693  | 2.0  | 0.696        | 1.9  | 0.693         | 2.0  | 0.696        | 1.9  | 0.693         | 2.0  | 0.696        | 1.9  |
|        | 3  |    |    |   |   |   |   |   | 0.668  | 2.1  | 0.669        | 2.1  | 0.668         | 2.1  | 0.669        | 2.1  | 0.668         | 2.1  | 0.669        | 2.1  |
|        | 4  |    |    |   |   |   |   |   | 0.718  | 2.3  | 0.730        | 2.4  | 0.718         | 2.3  | 0.730        | 2.4  | 0.718         | 2.3  | 0.730        | 2.4  |
|        | 5  |    |    |   |   |   |   |   | 0.660  | 1.8  | 0.664        | 1.9  | 0.666         | 2.0  | 0.668        | 2.0  | 0.671         | 2.2  | 0.669        | 1.8  |
|        | 6  |    |    |   |   |   |   |   | 0.709  | 2.1  | 0.713        | 2.1  | 0.711         | 2.2  | 0.722        | 2.2  | 0.715         | 2.2  | 0.719        | 2.0  |
|        | 7  |    |    |   |   |   |   |   | 0.693  | 2.3  | 0.696        | 2.2  | 0.699         | 2.4  | 0.710        | 2.2  | 0.695         | 2.3  | 0.701        | 2.2  |
|        | 8  |    |    |   |   |   |   |   | 0.729  | 2.3  | 0.744        | 2.3  | 0.731         | 2.4  | 0.749        | 2.6  | 0.732         | 2.4  | 0.744        | 2.4  |
| Silver | 9  |    |    |   |   |   |   |   | 0.833  | 4.1  | 0.839        | 4.1  | 0.833         | 4.1  | 0.840        | 4.2  | 0.833         | 4.4  | 0.840        | 4.5  |
|        | 10 |    |    |   |   |   |   |   | 0.830  | 4.0  | 0.836        | 4.3  | 0.830         | 4.0  | 0.836        | 4.3  | 0.830         | 4.0  | 0.836        | 4.3  |
|        | 11 |    |    |   |   |   |   |   | 0.862  | 5.2  | 0.872        | 5.0  | 0.861         | 5.3  | 0.870        | 5.1  | 0.862         | 4.9  | 0.869        | 4.9  |
|        | 12 |    |    |   |   |   |   |   | 0.862  | 5.3  | 0.872        | 5.0  | 0.862         | 5.3  | 0.872        | 5.0  | 0.862         | 5.3  | 0.872        | 5.0  |
| Gold   | 13 |    |    |   |   |   |   |   | 0.912  | 6.4  | 0.920        | 7.3  | 0.912         | 6.4  | 0.921        | 7.6  | 0.911         | 6.4  | 0.921        | 7.3  |
|        | 14 |    |    |   |   |   |   |   | 0.913  | 6.5  | 0.921        | 7.0  | 0.913         | 6.5  | 0.921        | 7.0  | 0.913         | 6.5  | 0.921        | 7.0  |
|        | 15 |    |    |   |   |   |   |   | 0.920  | 7.7  | 0.934        | 8.1  | 0.920         | 7.9  | 0.936        | 7.5  | 0.920         | 7.4  | 0.935        | 8.1  |
|        | 16 |    |    |   |   |   |   |   | 0.921  | 8.0  | 0.935        | 8.5  | 0.921         | 8.0  | 0.935        | 8.5  | 0.921         | 8.0  | 0.935        | 8.5  |
|        | 17 |    |    |   |   |   |   |   | 0.948  | 10.3 | 0.950        | 9.5  | 0.948         | 9.8  | 0.954        | 13.5 | 0.947         | 10.2 | 0.951        | 9.7  |
|        | 18 |    |    |   |   |   |   |   | 0.948  | 10.0 | 0.951        | 9.5  | 0.948         | 10.0 | 0.951        | 9.5  | 0.948         | 10.0 | 0.951        | 9.5  |
|        | 19 |    |    |   |   |   |   |   | 0.950  | 9.7  | 0.957        | 12.8 | 0.951         | 9.9  | 0.960        | 14.0 | 0.949         | 9.1  | 0.957        | 12.1 |
|        | 20 |    |    |   |   |   |   |   | 0.950  | 9.7  | 0.957        | 13.6 | 0.950         | 9.7  | 0.957        | 13.6 | 0.950         | 9.7  | 0.957        | 13.6 |

AUC, Area under the receiver operating curve; LR+, Positive likelihood ratio; Ag, Age; Ad, Age at asthma diagnosis; B, BMI; Q, SADT-item(s), Item 8, Item 8 and 17, Item 8 and 16, respectively; F, FEV<sub>1pp</sub>; R, R5-R20; X, AX. Shaded: the parameter is included in the model. BMI, age and age at asthma diagnosis represented by splines at quintiles. Plain, Model without interactions. The classification statistics (AUC, LR+) are based on a probability cut-off of 0.5 and are corrected for optimism through 500 bootstrap samples.

**Table A4** Comparison of results with recoded dichotomous answer options (yes, no/unknown) and original categorical answer options (yes, no, unknown).

| Model  | Data availability                             | N/Y |                        |                        | N/Y/UKN                |                        |
|--------|-----------------------------------------------|-----|------------------------|------------------------|------------------------|------------------------|
|        |                                               | N   | AUC                    | LR+                    | AUC                    | LR+                    |
| Bronze | Age, Age at asthma diagnosis, BMI, Question 8 | 763 | 0.744<br>(0.710-0.777) | 2.32<br>(2.11-2.52)    | 0.740<br>(0.706-0.773) | 2.41<br>(2.20-2.61)    |
| Silver | + FEV <sub>1</sub> % predicted                | 757 | 0.872<br>(0.847-0.896) | 5.00<br>(4.77-5.23)    | 0.870<br>(0.845-0.894) | 4.77<br>(4.55-5.00)    |
| Gold   | + R5-R20 + AX                                 | 506 | 0.957<br>(0.946-0.968) | 12.76<br>(12.35-13.18) | 0.958<br>(0.948-0.969) | 10.72<br>(10.34-11.10) |

AUC: Area under the ROC curve; LR+: Positive Likelihood Ratio; Complete case analysis. N/Y: Recoded question; N/Y/UKN: original, 3-categories SADT-item 8. The statistics (AUC, LR+) are corrected for optimism through 500 bootstrap samples.

**Table A5** Selection frequencies in 100 bootstrap models with individual dichotomised SAD parameters as outcome.

| Q  | RV/TLC | AX | R5-R20 | S <sub>sdic</sub> *VT | FEF <sub>50</sub> | FEF <sub>25-75</sub> | SADT-Item                                                                                                     |
|----|--------|----|--------|-----------------------|-------------------|----------------------|---------------------------------------------------------------------------------------------------------------|
| 8  | 59     | 94 | 97     | 17                    | 25                | 60                   | I sometimes wheeze when I am sitting or lying quietly                                                         |
| 26 | 72     | 7  | 23     | 21                    | 88                | 85                   | My tonsils or adenoids have been removed                                                                      |
| 46 | 42     | 20 | 29     | 30                    | 80                | 20                   | I almost always feel slightly asthmatic and I take a rescue puff regularly                                    |
| 47 | 25     | 41 | 39     | 68                    | 11                | 8                    | In stressful situations, I become especially short of breath                                                  |
| 52 | 9      | 77 | 61     | 19                    | 14                | 7                    | My shortness of breath symptoms and eczema alternate                                                          |
| 21 | 50     | 15 | 19     | 10                    | 63                | 19                   | When I become short of breath when exercising, it is very often due to the environment (grass, trees, pollen) |
| 59 | 12     | 5  | 6      | 5                     | 60                | 82                   | I become short of breath when I suddenly enter a cold environment                                             |
| 33 | 40     | 11 | 6      | 10                    | 75                | 25                   | Sometimes, when I'm short of breath, it can be a relief to burp                                               |
| 16 | 6      | 24 | 10     | 57                    | 38                | 24                   | As a child, I always participated in all games and sports                                                     |
| 27 | 70     | 15 | 40     | 6                     | 9                 | 17                   | When I am short of breath, I often also suffer from a sore throat                                             |
| 11 | 54     | 28 | 13     | 24                    | 21                | 17                   | I usually get a cold first, and afterwards I start coughing                                                   |
| 50 | 18     | 7  | 42     | 25                    | 27                | 37                   | I often get car sick or travel sick                                                                           |
| 36 | 54     | 61 | 11     | 7                     | 10                | 10                   | When I am short of breath, I sometimes feel bloated                                                           |
| 24 | 50     | 8  | 27     | 20                    | 23                | 13                   | I have suffered from bronchitis                                                                               |
| 17 | 44     | 15 | 27     | 20                    | 24                | 6                    | I am able to walk a long distance without having to rest                                                      |
| 62 | 8      | 11 | 14     | 66                    | 11                | 26                   | I get eczema because of weather changes                                                                       |
| 39 | 25     | 15 | 8      | 49                    | 24                | 4                    | When I am short of breath, I feel it in my chest                                                              |
| 43 | 19     | 58 | 24     | 10                    | 8                 | 5                    | There are often periods of time when I don't feel asthmatic and don't need rescue puffs                       |
| 3  | 4      | 33 | 35     | 10                    | 19                | 18                   | I cannot stand woolen blankets or clothes                                                                     |
| 37 | 16     | 10 | 7      | 7                     | 7                 | 70                   | When I am short of breath, I often have a sensation of tightness or pressure                                  |
| 28 | 9      | 30 | 13     | 10                    | 13                | 38                   | When I am short of breath, it often comes with symptoms of my throat, nose, ears or eyes                      |
| 12 | 27     | 9  | 46     | 6                     | 8                 | 11                   | When I am short of breath, I almost always have symptoms comparable to a cold                                 |
| 35 | 50     | 15 | 5      | 23                    | 6                 | 5                    | When I am short of breath, I feel a stab or a sting in my back or my ribs                                     |
| 45 | 17     | 9  | 19     | 16                    | 21                | 21                   | I can suddenly become short of breath without having any other symptoms                                       |
| 44 | 9      | 45 | 19     | 15                    | 9                 | 5                    | I can see it coming when I become short of breath                                                             |
| 32 | 8      | 5  | 6      | 15                    | 41                | 27                   | Sometimes I get asthma symptoms or short of breath because of heartburn                                       |
| 57 | 61     | 7  | 11     | 8                     | 7                 | 8                    | I tire more rapidly due to weather changes                                                                    |
| 60 | 15     | 22 | 6      | 11                    | 31                | 15                   | My breathing becomes easier in cold air                                                                       |
| 58 | 20     | 22 | 8      | 15                    | 26                | 8                    | I become short of breath more rapidly due to weather changes                                                  |
| 34 | 14     | 14 | 10     | 15                    | 13                | 30                   | Sometimes I have stomach problems which can make me short of breath                                           |
| 49 | 13     | 19 | 13     | 22                    | 18                | 11                   | I always sleep with an open window, otherwise I become short of breath                                        |
| 6  | 10     | 16 | 25     | 13                    | 24                | 8                    | I'm not able to breathe in deeply when I am short of breath                                                   |
| 15 | 24     | 7  | 13     | 10                    | 11                | 30                   | I usually have runny or painful eyes when I have hay fever                                                    |
| 23 | 11     | 16 | 8      | 12                    | 24                | 20                   | Actually, I cannot perform strenuous exercise or sport, because I will become short of breath                 |
| 13 | 37     | 10 | 2      | 8                     | 17                | 17                   | My ears are often painful                                                                                     |
| 20 | 12     | 13 | 27     | 21                    | 3                 | 11                   | When I'm physically active (like walking up the stairs), I sometimes wheeze                                   |
| 9  | 9      | 38 | 12     | 9                     | 8                 | 9                    | I only wheeze when I am very short of breath                                                                  |
| 30 | 4      | 18 | 11     | 33                    | 7                 | 11                   | I often have a shallow, tickly cough before I get bothered by coughing more deeply                            |
| 18 | 9      | 6  | 16     | 13                    | 21                | 15                   | When I'm not ill, I can easily do physical activities such as walking up the stairs                           |
| 22 | 20     | 3  | 12     | 8                     | 26                | 9                    | Physical activities always make my asthma worse                                                               |
| 2  | 12     | 14 | 4      | 4                     | 20                | 16                   | I have an immediate allergic reaction to birds                                                                |
| 63 | 12     | 7  | 15     | 20                    | 7                 | 9                    | When I become short of breath when exercising, it is very often due to the weather                            |
| 61 | 6      | 5  | 11     | 29                    | 11                | 8                    | My asthma worsens in autumn                                                                                   |
| 1  | 11     | 9  | 8      | 8                     | 24                | 5                    | I have an immediate allergic reaction to cats                                                                 |
| 10 | 7      | 8  | 5      | 12                    | 15                | 11                   | My shortness of breath symptoms come on after the flu or a cold                                               |
| 14 | 10     | 8  | 7      | 2                     | 5                 | 23                   | I often have runny or painful eyes without having hay fever                                                   |
| 31 | 2      | 6  | 10     | 11                    | 15                | 9                    | In stressful situations I have physical symptoms, for instance of the nose, throat or voice                   |
| 25 | 12     | 6  | 8      | 10                    | 6                 | 8                    | I frequently have a hoarse or husky voice                                                                     |
| 29 | 13     | 8  | 8      | 8                     | 7                 | 3                    | I often cough unexpectedly                                                                                    |
| 19 | 4      | 8  | 9      | 10                    | 6                 | 8                    | Sometimes I go running or jogging                                                                             |

Q: SADT-item
